# Supplementary material for: Mechanisms governing codon usage bias and the implications for protein expression in the chloroplast of Chlamydomonas reinhardtii
Source: PubMed Central journal article supplement (PMC9828097; doi:10.1111/tpj.15970), 2022-10-19
Supplement: TPJ-112-919-s001.pdf [file TPJ-112-919-s001.pdf]

## Supplemental Tables and Figures

### “Mechanisms governing codon usage bias and the implications for protein expression in the chloroplast”

2021

*Fages-Lartaud et al.*

#### **Tables of Content:**

**Supplemental Figure S1.** Method comparison of codon pair bias calculations for each expression groups..... *p2*

**Supplemental Figure S2.** Gene maps showing the position of translationally unfavorable codons for three expression groups (High, intermediate, low)..... *p3*

**Supplemental Figure S3.** Cumulative GC contents of the ramps of Top 18 and Low 8 genes..... *p4*

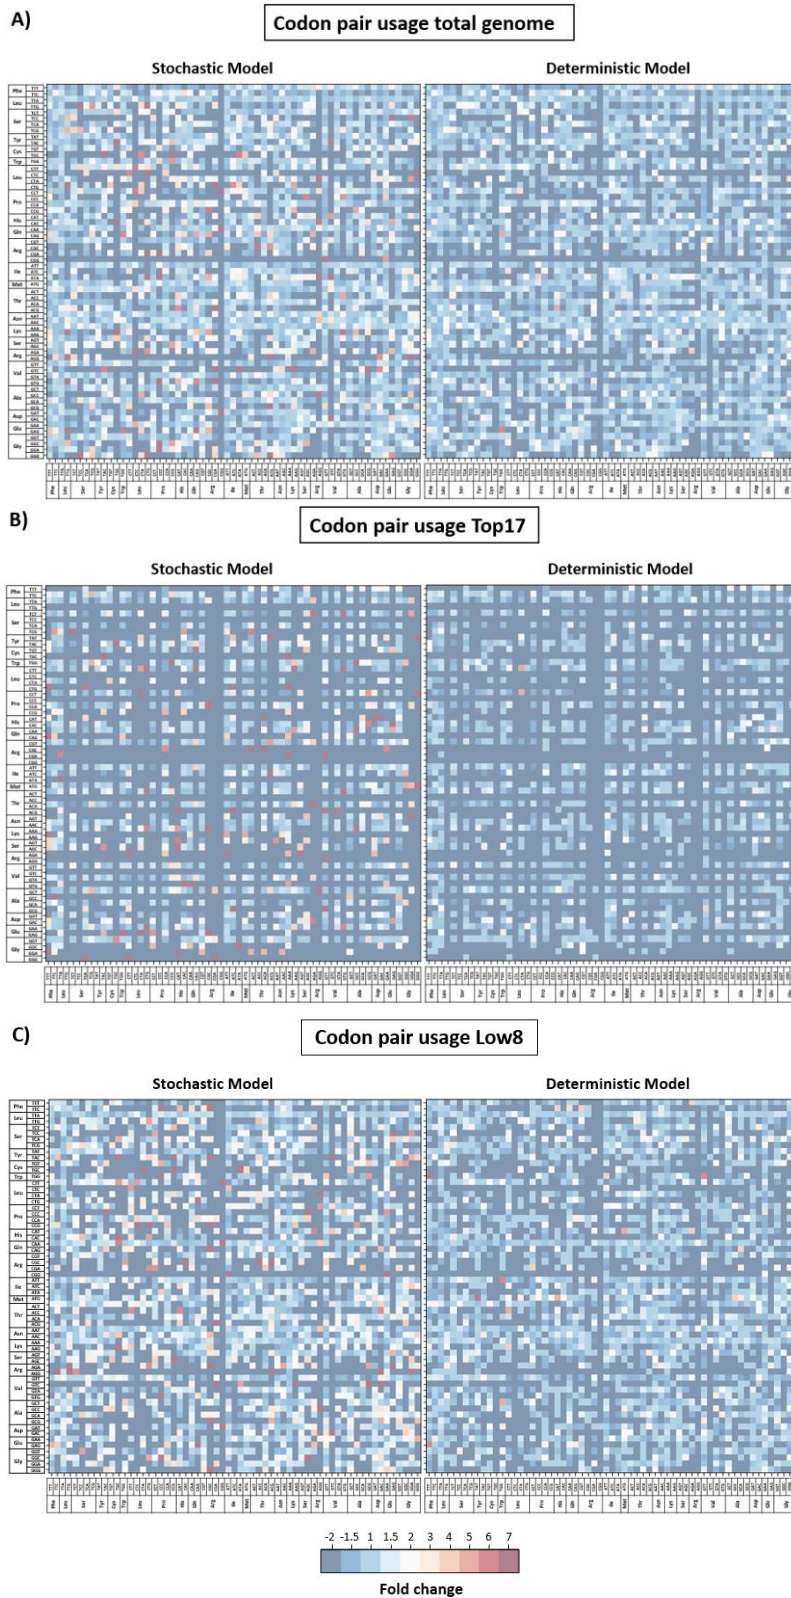

**Supplemental Figure S1. Method comparison of codon pair bias calculations for each expression groups.** The “stochastic” model refers to calculations used in the literature that artificially create a bias for rare codons. These calculations divide by an expected frequency ( $e_{ij}$ ) that is by design very low, thus it inflates the difference with the observed codon pairs ( $\text{Bias} = (o_{ij} - e_{ij}) / e_{ij}$ ). When considering rare codons under a deterministic model, we ensure that these codons will form either 0 or 1 pair. Under this assumption, we eliminate most artificial inflation of codon pair bias.

### Top 17 expression group

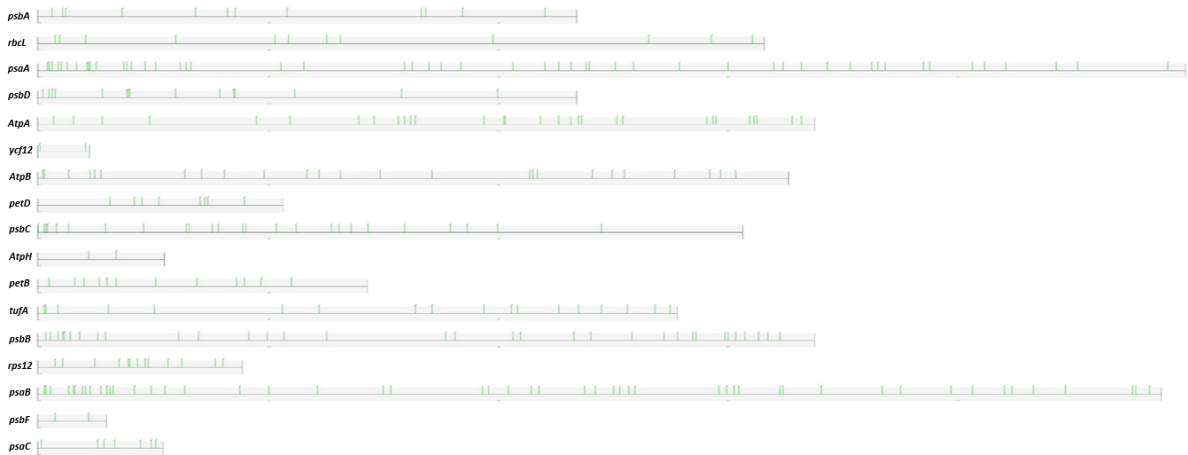

### Intermediate expression

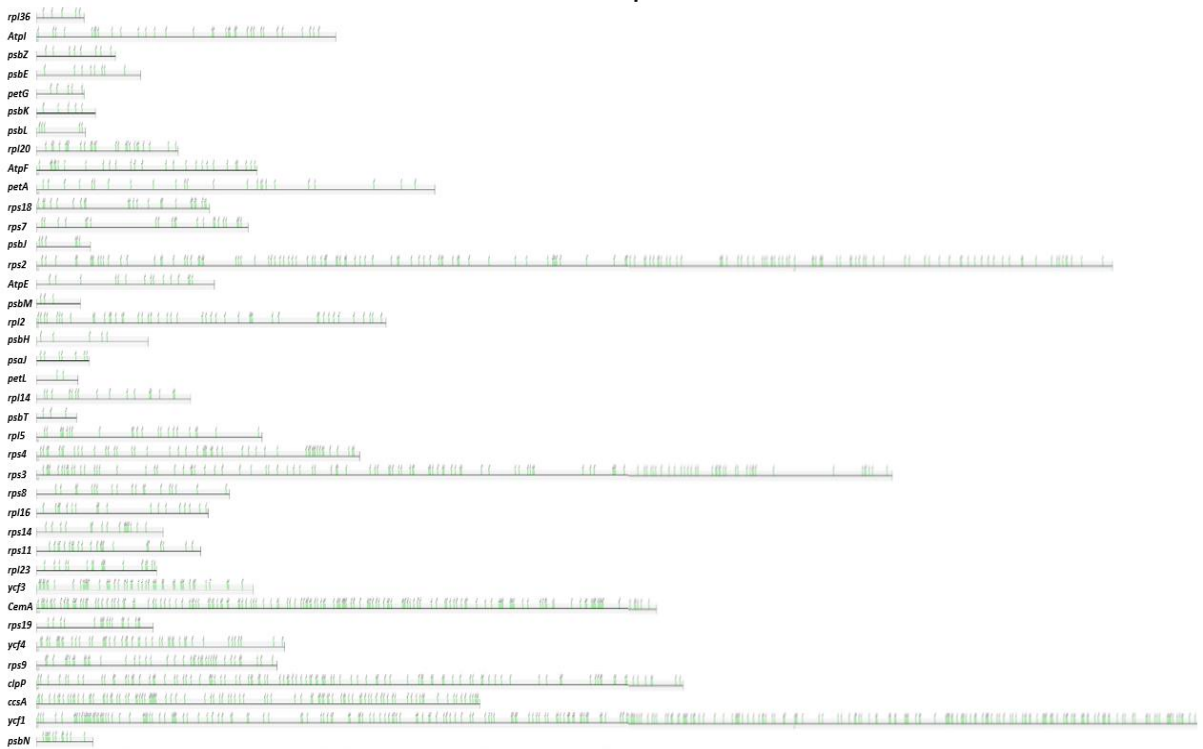

### Low 8 expression group

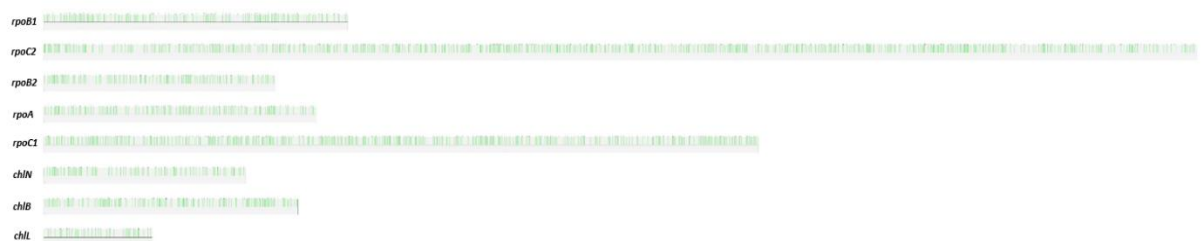

**Supplemental Figure S2. Gene maps showing the position of translationally unfavorable codons for three expression groups (High, intermediate, low). The unfavorable codons represented here are listed in *Supplemental Data S1*.**

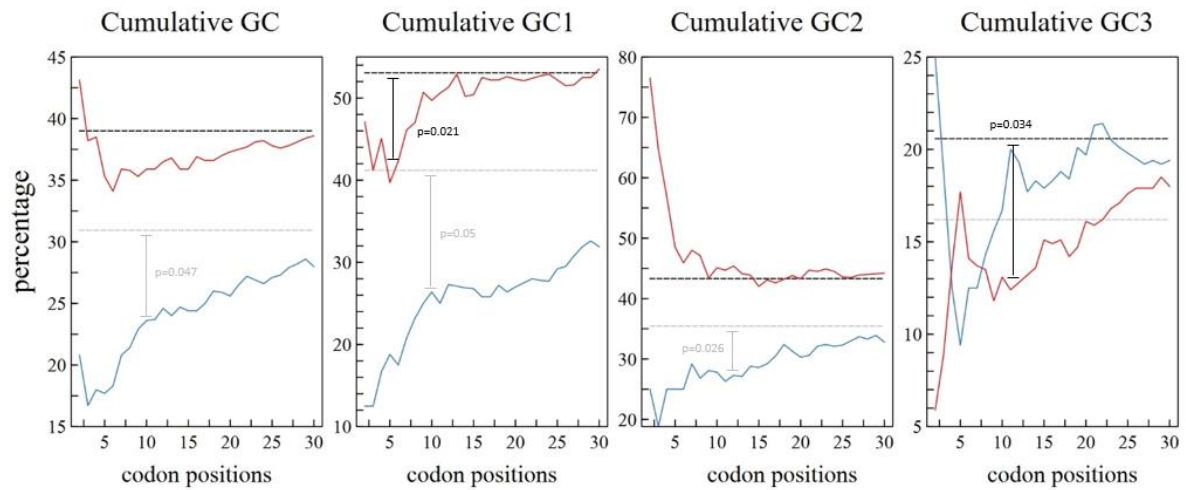

**Supplemental Figure S3. Cumulative GC contents of the ramps of Top 18 (red) and Low 8 (blue) genes.** The cumulative GC content of each codon position was calculated (GC1,2,3) and the total cumulative GC. The average for each value are represented with a dotted line, black for top 18 and grey for Low 8. Significant deviations from the average are shown with their respective p-values.
